# Supplementary material for: Potential mammary carcinogens used in food contact articles: implications for policy, enforcement, and prevention
Source: Front Toxicol. 2024 Sep 24;6:1440331. doi: 10.3389/ftox.2024.1440331 (PMC11458522; doi:10.3389/ftox.2024.1440331)
Supplement: Supplementary file 1 [file DataSheet1.xlsx]

## Sheet: READ ME
Appendix - Potential mammary carcinogens used in food contact articles: Implications for policy, enforcement, and prevention Frontiers in Toxicology Lindsey V. Parkinson*, Birgit Geueke, Jane Muncke Food Packaging Forum Foundation, 8045 Zürich, Switzerland *Correspondence: Lindsey V. Parkinson lindsey.parkinson at fp-forum.org
All potential mammary carcinogens that have been detected in food contact materials (FCMs) according to Kay et al. 2024 and the Database on migrating and extractable food contact chemicals (FCCmigex). The studies included in FCCmigex as of this publication were available online by October 2022. Total FCCmigex database entries: The number of times the chemical was detected in an FCM (through Octob…
Resources
Kay et al. 2024 - https://doi.org/10.1289/EHP13233
FCCmigex - https://www.foodpackagingforum.org/fccmigex

## Sheet: Appendix
CASRN	Name	Total FCCmigex database entries (detected=Yes)	All FCMs where potential mammary carcinogen was detected	Key characteristic(s) (Kay et al. 2024)	Inclusion in EU REACH list(s)	EU hazard class (harmonized)
'100-42-5	Styrene	99	Plastics, Unspecified, Paper & Board, Multi-materials	MC, Genotoxic	-	Flam. Liq. 3 Repr. 2 Acute Tox. 4 STOT RE 1 Skin Irrit. 2 Eye Irrit. 2
'100-51-6	Benzyl alcohol	11	Metals, Paper & Board, Plastics, Unspecified, Multi-materials	Genotoxic, EDC~	CoRAP list	Acute Tox. 4
'101-14-4	4,4'-Methylenebis(2-chloroaniline)	4	Plastics, Unspecified	MC, Genotoxic	Candidate list, Authorisation list (annex XIV)	Carc. 1B Acute Tox. 4 Aquatic Acute 1 Aquatic Chronic 1
'101-77-9	4,4'-Diaminobiphenyl methane	37	Paper & Board, Multi-materials, Plastics, Unspecified	Genotoxic, EDC+	Candidate list, Authorisation list (annex XIV)	Carc. 1B Muta. 2 STOT SE 1 STOT RE 2 Skin Sens. 1 Aquatic Chronic 2
'101-81-5	Diphenylmethane	4	Plastics	EDC~	-	No harmonized CLP classification
'102-76-1	Triacetin	37	Plastics, Paper & Board, Unspecified, Metals, Multi-materials	EDC~	-	No harmonized CLP classification
'1031-07-8	Endosulfan sulfate	1	Unspecified	EDC+	-	No harmonized CLP classification
'1034-01-1	Octyl gallate	2	Plastics	EDC+	-	Acute Tox. 4 Skin Sens. 1
'103-41-3	Benzyl cinnamate	2	Plastics	EDC~	-	No harmonized CLP classification
'103-65-1	Propylbenzene	8	Plastics, Paper & Board	EDC~	-	Flam. Liq. 3 Asp. Tox. 1 STOT SE 3 Aquatic Chronic 2
'104-40-5	4-Nonylphenol	39	Plastics, Unspecified, Paper & Board, Metals	EDC~	Candidate list	No harmonized CLP classification
'104-66-5	1,2-Diphenoxyethane	7	Plastics, Metals, Paper & Board	Genotoxic, EDC~	-	No harmonized CLP classification
'104-67-6	5-Heptyldihydro-2(3H)-furanone	4	Plastics, Metals	EDC+	-	No harmonized CLP classification
'105-67-9	2,4-Dimethylphenol	1	Plastics	Genotoxic, EDC+	-	Acute Tox. 3 Skin Corr. 1B Aquatic Chronic 2
'106-30-9	Ethyl heptanoate	2	Plastics	EDC~	-	No harmonized CLP classification
'106-44-5	p-Cresol	4	Plastics, Unspecified, Paper & Board	Genotoxic, EDC+	-	Acute Tox. 3 Skin Corr. 1B
'106-47-8	4-Chloroaniline	8	Paper & Board, Plastics	Genotoxic, EDC+	-	Carc. 1B Acute Tox. 3 Skin Sens. 1 Aquatic Acute 1 Aquatic Chronic 1
'106-48-9	4-Chlorophenol	2	Metals, Unspecified	Genotoxic, EDC~	-	Acute Tox. 4 Aquatic Chronic 2
'106-50-3	1,4-Benzenediamine	1	Plastics	MC, Genotoxic, EDC+	-	Acute Tox. 3 Eye Irrit. 2 Skin Sens. 1 Acute Tox. 3 Aquatic Acute 1 Aquatic Chronic 1
'106-87-6	4-Vinyl-1-cyclohexene dioxide	1	Plastics	Genotoxic	-	Acute Tox. 4 Acute Tox. 3 Muta. 2 Carc. 1B Repr. 1B
'106-99-0	1,3-Butadiene	7	Plastics, Unspecified	MC, Genotoxic	CoRAP list	Flam. Gas 1 Press. Gas Carc. 1A Muta. 1B
'107-13-1	Acrylonitrile	4	Plastics	MC, Genotoxic		Flam. Liq. 2 Carc. 1B Acute Tox. 3 STOT SE 3 Skin Irrit. 2 Eye Dam. 1 Skin Sens. 1 Aquatic Chronic 2
'107-98-2	1-Methoxy-2-propanol	3	Plastics, Paper & Board	EDC~	-	Flam. Liq. 3 STOT SE 3
'108-21-4	Isopropyl acetate	2	Plastics	EDC~	-	Flam. Liq. 2 Eye Irrit. 2 STOT SE 3
'108-39-4	m-Cresol	6	Plastics, Paper & Board	Genotoxic, EDC~	-	Acute Tox. 3 Skin Corr. 1B
'108-44-1	3-Methylaniline	1	Plastics	EDC~	-	Acute Tox. 3 STOT RE 2 Aquatic Acute 1
'108-45-2	1,3-Benzenediamine	6	Paper & Board, Plastics	Genotoxic, EDC~	CoRAP list	Eye Irrit. 2 Skin Sens. 1 Acute Tox. 3 Muta. 2 Aquatic Acute 1 Aquatic Chronic 1
'110-43-0	2-Heptanone	9	Plastics, Multi-materials, Unspecified, Paper & Board, Metals	EDC~	-	Flam. Liq. 3 Acute Tox. 4
'111-71-7	Heptanal	19	Plastics, Multi-materials, Metals, Paper & Board, Unspecified	EDC~	-	No harmonized CLP classification
'112-05-0	Nonanoic acid	22	Paper & Board, Plastics, Unspecified, Metals, Multi-materials	EDC+	-	Aquatic Chronic 3 Eye Irrit. 2 Skin Irrit. 2
'115-86-6	Triphenyl phosphate	25	Plastics, Paper & Board, Multi-materials, Metals, Unspecified	EDC+	CoRAP list	No harmonized CLP classification
'117-81-7	Di(2-ethylhexyl) phthalate	329	Plastics, Multi-materials, Paper & Board, Unspecified, Metals	Genotoxic, EDC+	Candidate list, Authorisation list (annex XIV), Restriction list (annex XVII)	Repr. 1B
'117-99-7	2-Hydroxybenzophenone	2	Plastics, Paper & Board	EDC~	-	No harmonized CLP classification
'118-56-9	3,3,5-Trimethylcyclohexyl salicylate	3	Unspecified, Plastics	EDC+	-	No harmonized CLP classification
'118-79-6	2,4,6-Tribromophenol	9	Unspecified, Plastics	Genotoxic, EDC+	CoRAP list	No harmonized CLP classification
'118-82-1	4,4'-Methylenebis(2,6-di-t-butylphenol)	2	Plastics	EDC~	CoRAP list	No harmonized CLP classification
'119-61-9	Benzophenone	138	Plastics, Metals, Paper & Board, Unspecified, Multi-materials	EDC~	CoRAP list	No harmonized CLP classification
'119-93-7	3,3'-Dimethylbenzidine	10	Plastics, Unspecified	MC, Genotoxic, EDC+	Restriction list (annex XVII)	Carc. 1B Acute Tox. 4 Aquatic Chronic 2
'120-12-7	Anthracene	17	Paper & Board, Unspecified, Plastics	Genotoxic, EDC+	Candidate list	No harmonized CLP classification
'120-14-9	Veratraldehyde	1	Plastics	EDC~	-	No harmonized CLP classification
'120-18-3	Naphthalene-2-sulfonic acid	1	Metals	EDC~	-	No harmonized CLP classification
'120-47-8	Ethylparaben	2	Unspecified, Plastics	EDC+	CoRAP list	No harmonized CLP classification
'120-51-4	Benzyl benzoate	11	Plastics, Paper & Board	EDC~	-	Acute Tox. 4 Aquatic Chronic 2
'1207-12-1	4,6-Dimethyldibenzothiophene	5	Paper & Board, Plastics	EDC~	-	No harmonized CLP classification
'120-71-8	2-Methoxy-5-methylaniline	1	Plastics	Genotoxic, EDC+	Candidate list	Carc. 1B Acute Tox. 4
'120-83-2	2,4-Dichlorophenol	1	Metals	Genotoxic, EDC+	-	Acute Tox. 4 Acute Tox. 3 Skin Corr. 1B Aquatic Chronic 2
'121-00-6	2-tert-Butyl-4-methoxyphenol	2	Metals, Plastics	EDC~	CoRAP list	No harmonized CLP classification
'121-33-5	4-Hydroxy-3-methoxybenzaldehyde	20	Unspecified, Metals, Plastics, Paper & Board	Genotoxic, EDC~	-	No harmonized CLP classification
'121-79-9	Propyl gallate	1	Plastics	Genotoxic, EDC~	-	Acute Tox. 4 Skin Sens. 1
'122-39-4	Diphenylamine	4	Plastics	Genotoxic, EDC+	-	Acute Tox. 3 STOT RE 2 Aquatic Acute 1 Aquatic Chronic 1
'123-07-9	4-Ethylphenol	1	Paper & Board	Genotoxic, EDC~	-	No harmonized CLP classification
'123-31-9	Hydroquinone	3	Paper & Board, Multi-materials	Genotoxic, EDC+	CoRAP list	Aquatic Acute 1 Carc. 2 Muta. 2 Eye Dam. 1 Acute Tox. 4 Skin Sens. 1
'123-91-1	1,4-Dioxane	1	Plastics	MC, Genotoxic	Candidate list	Flam. Liq. 2 Eye Irrit. 2 STOT SE 3 Carc. 1B
'1241-94-7	2-Ethylhexyl diphenyl phosphate	16	Plastics, Paper & Board, Multi-materials, Unspecified, Metals	EDC~	-	No harmonized CLP classification
'124-22-1	1-Dodecanamine	1	Plastics	EDC+	-	No harmonized CLP classification
'127-18-4	Tetrachloroethylene	3	Plastics, Unspecified, Multi-materials	MC, Genotoxic	CoRAP list	Carc. 2 Aquatic Chronic 2
'129-00-0	Pyrene	18	Paper & Board, Plastics, Multi-materials, Unspecified	Genotoxic, EDC+	Candidate list	No harmonized CLP classification
'13048-33-4	1,6-Hexanediol diacrylate	8	Plastics, Multi-materials, Paper & Board	EDC+	-	Skin Irrit. 2 Eye Irrit. 2 Skin Sens. 1
'131-11-3	Dimethyl phthalate	66	Metals, Plastics, Paper & Board, Unspecified, Multi-materials	Genotoxic, EDC~	-	No harmonized CLP classification
'131-17-9	Diallyl phthalate	8	Plastics, Metals, Unspecified	Genotoxic, EDC~	CoRAP list	Acute Tox. 4 Aquatic Acute 1 Aquatic Chronic 1
'131-18-0	Dipentyl phthalate	13	Plastics, Paper & Board	EDC~	Candidate list, Authorisation list (annex XIV)	Repr. 1B Aquatic Acute 1
'131-56-6	2,4-Dihydroxybenzophenone	2	Plastics	EDC+	-	No harmonized CLP classification
'131-57-7	2-Hydroxy-4-methoxybenzophenone	8	Plastics, Multi-materials	Genotoxic, EDC+	CoRAP list	No harmonized CLP classification
'140-66-9	4-(1,1,3,3-Tetramethylbutyl)phenol	24	Unspecified, Plastics, Multi-materials, Metals	Genotoxic, EDC+	Candidate list	Skin Irrit. 2 Eye Dam. 1 Aquatic Acute 1 Aquatic Chronic 1
'142-18-7	1-Monolaurin	1	Plastics	EDC~	-	No harmonized CLP classification
'143-08-8	1-Nonanol	7	Plastics, Unspecified	EDC~	-	No harmonized CLP classification
'14371-10-9	(2E)-3-Phenylprop-2-enal	1	Plastics	Genotoxic, EDC~	-	No harmonized CLP classification
'1459-93-4	Dimethyl isophthalate	3	Metals, Plastics	EDC+	-	No harmonized CLP classification
'1478-61-1	Bisphenol AF	14	Plastics, Metals, Multi-materials, Paper & Board	EDC+	-	No harmonized CLP classification
'14938-35-3	4-Pentylphenol	3	Plastics	EDC+	-	No harmonized CLP classification
'1596-84-5	Daminozide	1	Plastics	Genotoxic, EDC~	-	Carc. 2
'1638-22-8	4-Butylphenol	2	Plastics	EDC+	-	No harmonized CLP classification
'1843-05-6	Octabenzone	21	Plastics, Paper & Board	EDC~	CoRAP list	No harmonized CLP classification
'1987-50-4	4-Heptylphenol	3	Plastics	EDC+	Candidate list	No harmonized CLP classification
'205-99-2	Benzo(b)fluoranthene	10	Paper & Board, Plastics, Unspecified	Genotoxic, EDC~	Restriction list (annex XVII)	Carc. 1B Aquatic Acute 1 Aquatic Chronic 1
'206-44-0	Fluoranthene	17	Paper & Board, Plastics, Unspecified	Genotoxic, EDC+	Candidate list	No harmonized CLP classification
'208-96-8	Acenaphthylene	7	Paper & Board, Plastics, Unspecified	EDC~	-	No harmonized CLP classification
'21245-02-3	2-Ethylhexyl 4-(dimethylamino)benzoate	54	Paper & Board, Plastics, Multi-materials, Unspecified, Metals	EDC~	-	No harmonized CLP classification
'23128-74-7	Antioxidant 1098	5	Plastics	EDC+	-	No harmonized CLP classification
'23696-85-7	Damascenone	1	Unspecified	EDC~	-	No harmonized CLP classification
'23726-91-2	(E)-beta-Damascone	2	Unspecified	EDC+	-	No harmonized CLP classification
'2440-22-4	2-(2H-Benzotriazol-2-yl)-4-methylphenol	10	Plastics, Unspecified	EDC~	CoRAP list	No harmonized CLP classification
'24602-86-6	Tridemorph	1	Paper & Board	EDC+	-	Acute Tox. 4 Skin Irrit. 2 Aquatic Acute 1 Aquatic Chronic 1 Repr. 1B
'24851-98-7	Methyl dihydrojasmonate	5	Plastics, Multi-materials, Unspecified	EDC+	-	No harmonized CLP classification
'26172-55-4	5-Chloro-2-methyl-3(2H)-isothiazolone	7	Paper & Board, Multi-materials	Genotoxic, EDC+	-	No harmonized CLP classification
'26471-62-5	Toluene diisocyanate	1	Unspecified	MC, Genotoxic	CoRAP list, Restriction list (annex XVII)	Skin Irrit. 2 Eye Irrit. 2 Skin Sens. 1 Acute Tox. 2 STOT SE 3 Resp. Sens. 1 Carc. 2 Aquatic Chronic 3
'2772-45-4	2,4-Bis(1-methyl-1-phenylethyl)phenol	4	Plastics	EDC~	-	No harmonized CLP classification
'28804-88-8	Dimethylnaphthalene	1	Paper & Board	EDC~	-	No harmonized CLP classification
'2943-75-1	Triethoxyoctylsilane	1	Multi-materials	EDC~	-	No harmonized CLP classification
'319-85-7	beta-Hexachlorocyclohexane	1	Unspecified	EDC~	-	No harmonized CLP classification
'3319-31-1	Tris(2-ethylhexyl) trimellitate	9	Plastics, Paper & Board	EDC+	CoRAP list	No harmonized CLP classification
'41481-66-7	4,4'-Sulfonylbis2-(prop-2-en-1-yl)phenol	2	Paper & Board	EDC+	-	Skin Sens. 1 Aquatic Chronic 2
'42978-66-5	Tripropylene glycol diacrylate	10	Multi-materials, Paper & Board, Plastics, Unspecified	EDC~	-	Eye Irrit. 2 Skin Irrit. 2 Skin Sens. 1 STOT SE 3 Aquatic Chronic 2
'4376-20-9	MEHP	7	Plastics, Paper & Board	EDC~	-	No harmonized CLP classification
'4602-84-0	Farnesol	1	Plastics	EDC~	-	No harmonized CLP classification
'487-06-9	5,7-Dimethoxy-2H-chromen-2-one	1	Plastics	EDC+	-	No harmonized CLP classification
'497-39-2	3-Methyl-4,6-di-tert-butylphenol	1	Plastics	EDC~	-	No harmonized CLP classification
'499-75-2	Isopropyl-o-cresol	2	Unspecified	Genotoxic, EDC~	-	No harmonized CLP classification
'50-29-3	DDT	1	Unspecified	Genotoxic, EDC+	-	Acute Tox. 3 Carc. 2 STOT RE 1 Aquatic Acute 1 Aquatic Chronic 1
'50-32-8	Benzo(a)pyrene	13	Paper & Board, Plastics, Multi-materials, Unspecified	MC, Genotoxic	Candidate list, Restriction list (annex XVII)	Carc. 1B Muta. 1B Repr. 1B Skin Sens. 1 Aquatic Acute 1 Aquatic Chronic 1
'52-01-7	Spironolactone	1	Plastics	EDC+	-	No harmonized CLP classification
'52315-07-8	Cypermethrin	1	Unspecified	Genotoxic, EDC~	-	Acute Tox. 4 Skin Irrit. 2 Skin Sens. 1 STOT SE 3 Aquatic Acute 1 Aquatic Chronic 1
'52645-53-1	Permethrin	1	Unspecified	Genotoxic, EDC+	-	Acute Tox. 4 Skin Sens. 1 Aquatic Acute 1 Aquatic Chronic 1
'53-19-0	1-(2-Chlorophenyl)-1-(4-chlorophenyl)-2,2-dichloroethane	1	Unspecified	Genotoxic, EDC+	-	No harmonized CLP classification
'532-27-4	2-Chloroacetophenone	1	Plastics	MC, Genotoxic, EDC~	-	No harmonized CLP classification
'53-70-3	Dibenz(a,h)anthracene	9	Paper & Board, Plastics, Unspecified	MC, Genotoxic	Restriction list (annex XVII)	Carc. 1B Aquatic Acute 1 Aquatic Chronic 1
'563-04-2	Tri-m-tolyl phosphate	1	Plastics	EDC~	-	No harmonized CLP classification
'56-55-3	Benz(a)anthracene	11	Paper & Board, Plastics, Unspecified	Genotoxic, EDC+	Candidate list, Restriction list (annex XVII)	Carc. 1B Aquatic Acute 1 Aquatic Chronic 1
'57-11-4	Octadecanoic acid	53	Plastics, Unspecified, Paper & Board, Metals	EDC+	-	No harmonized CLP classification
'585-34-2	3-tert-Butylphenol	1	Plastics	EDC+	-	No harmonized CLP classification
'5888-33-5	Isobornyl acrylate	1	Plastics	EDC~	-	Skin Sens. 1A
'59-50-7	4-Chloro-3-methylphenol	1	Paper & Board	Genotoxic, EDC+	-	Acute Tox. 4 Skin Corr. 1C Eye Dam. 1 Skin Sens. 1B STOT SE 3 Aquatic Acute 1 Aquatic Chronic 3
'599-64-4	4-Cumylphenol	1	Plastics	EDC+	-	No harmonized CLP classification
'60-09-3	C.I. Solvent Yellow 1	1	Paper & Board	Genotoxic, EDC+	Candidate list	Carc. 1B Aquatic Acute 1 Aquatic Chronic 1
'603-35-0	Triphenylphosphine	2	Plastics	EDC~	-	No harmonized CLP classification
'605-45-8	Diisopropyl phthalate	4	Paper & Board, Plastics	EDC~	-	No harmonized CLP classification
'60-57-1	Dieldrin	1	Unspecified	MC, Genotoxic, EDC~	-	Acute Tox. 3 Acute Tox. 1 Carc. 2 STOT RE 1 Aquatic Acute 1 Aquatic Chronic 1
'620-17-7	3-Ethylphenol	2	Plastics, Unspecified	Genotoxic, EDC~	-	No harmonized CLP classification
'620-92-8	Bis(4-hydroxyphenyl)methane	23	Plastics, Metals, Paper & Board	EDC~	-	No harmonized CLP classification
'6259-76-3	Hexyl salicylate	2	Plastics	EDC~	CoRAP list	No harmonized CLP classification
'629-76-5	1-Pentadecanol	2	Unspecified, Paper & Board	EDC~	-	No harmonized CLP classification
'64-17-5	Ethanol	9	Paper & Board, Plastics, Unspecified	MC, Genotoxic	-	Flam. Liq. 2
'645-56-7	4-Propylphenol	3	Plastics	EDC~	-	No harmonized CLP classification
'6683-19-8	Irganox 1010	66	Plastics, Multi-materials, Unspecified, Paper & Board	EDC+	-	No harmonized CLP classification
'678-39-7	3,3,4,4,5,5,6,6,7,7,8,8,9,9,10,10,10-Heptadecafluoro-1-decanol	15	Paper & Board, Plastics, Unspecified	EDC~	-	No harmonized CLP classification
'68-26-8	Retinol	1	Unspecified	Genotoxic, EDC~	-	No harmonized CLP classification
'683-18-1	Dibutyltin dichloride	3	Plastics	Genotoxic, EDC~	Candidate list	Muta. 2 Repr. 1B Acute Tox. 2 Acute Tox. 3 Acute Tox. 4 STOT RE 1 Skin Corr. 1B Aquatic Acute 1 Aquatic Chronic 1
68359-37-5	Cyfluthrin	1	Unspecified	MC	-	Acute Tox. 2 Lact. STOT SE 1 Aquatic Acute 1 Aquatic Chronic 1
'6846-50-0	2,2,4-Trimethyl-1,3-pentanediol diisobutyrate	32	Plastics, Unspecified, Paper & Board, Metals, Multi-materials	EDC~	-	No harmonized CLP classification
'71-43-2	Benzene	29	Plastics, Paper & Board, Unspecified, Multi-materials, Metals	MC, Genotoxic	Restriction list (annex XVII)	Flam. Liq. 2 Carc. 1A Muta. 1B STOT RE 1 Asp. Tox. 1 Eye Irrit. 2 Skin Irrit. 2
'72-54-8	p,p'-DDD	1	Unspecified	Genotoxic, EDC~	-	No harmonized CLP classification
'72-55-9	p,p'-DDE	2	Unspecified	Genotoxic, EDC~	-	No harmonized CLP classification
'75-01-4	Vinyl chloride	5	Plastics	MC, Genotoxic	Restriction list (annex XVII)	Press. Gas Flam. Gas 1 Carc. 1A
'75-07-0	Acetaldehyde	40	Paper & Board, Plastics, Unspecified	MC, Genotoxic	-	Flam. Liq. 1 Carc. 1B Muta. 2 STOT SE 3 Eye Irrit. 2
'75-09-2	Dichloromethane	5	Plastics, Paper & Board	MC, Genotoxic	CoRAP list, Restriction list (annex XVII)	Carc. 2
'75-35-4	1,1-Dichloroethylene	3	Plastics	MC, Genotoxic	Restriction list (annex XVII)	Flam. Liq. 1 Acute Tox. 4 Carc. 2
'754-91-6	Perfluorooctanesulfonamide	3	Paper & Board, Unspecified	EDC~	-	No harmonized CLP classification
'76-03-9	Trichloroacetic acid	1	Unspecified	Genotoxic, EDC~	-	Skin Corr. 1A Aquatic Acute 1 Aquatic Chronic 1
'77-40-7	Bisphenol B	4	Plastics, Paper & Board	EDC+	Candidate list	No harmonized CLP classification
'78-63-7	2,5-Dimethyl-2,5-di-(tert-butylperoxy)hexane	2	Paper & Board, Metals	EDC~	-	No harmonized CLP classification
'789-02-6	o,p'-DDT	1	Unspecified	Genotoxic, EDC+	-	No harmonized CLP classification
'79-01-6	Trichloroethylene	1	Plastics	MC, Genotoxic	Candidate list, Authorisation list (annex XIV)	Carc. 1B Muta. 2 Eye Irrit. 2 Skin Irrit. 2 STOT SE 3 Aquatic Chronic 3
'79-06-1	Acrylamide	2	Paper & Board	MC, Genotoxic	Candidate list, Restriction list (annex XVII)	Carc. 1B Muta. 1B Repr. 2 Acute Tox. 3 STOT RE 1 Acute Tox. 4 Eye Irrit. 2 Skin Irrit. 2 Skin Sens. 1
'79-94-7	3,3',5,5'-Tetrabromobisphenol A	13	Plastics, Unspecified	EDC+	CoRAP list, Candidate list	Aquatic Acute 1 Aquatic Chronic 1
'79-95-8	2,2',6,6'-Tetrachlorobisphenol A	4	Paper & Board	EDC+	-	No harmonized CLP classification
'79-97-0	3,3'-Dimethylbisphenol A	4	Metals, Paper & Board, Plastics	Genotoxic, EDC~	CoRAP list	No harmonized CLP classification
'80-05-7	Bisphenol A	253	Paper & Board, Plastics, Unspecified, Metals, Multi-materials	Genotoxic, EDC+	Candidate list, CoRAP list, Restriction list (annex XVII)	Repr. 2 STOT SE 3 Eye Dam. 1 Skin Sens. 1
'80-09-1	4,4'-Sulfonyldiphenol	26	Plastics, Paper & Board, Metals, Multi-materials, Unspecified	Genotoxic, EDC+	CoRAP list	No harmonized CLP classification
'80-43-3	Dicumyl peroxide	2	Plastics, Unspecified	EDC+	CoRAP list	Org. Perox. F Repr. 1B Skin Irrit. 2 Eye Irrit. 2 Aquatic Chronic 2
'80-46-6	4-(2-Methylbutan-2-yl)phenol	5	Multi-materials, Plastics	EDC+	CoRAP list, Candidate list	No harmonized CLP classification
'838-88-0	4,4'-Methylenebis(o-toluidine)	1	Paper & Board	MC, Genotoxic, EDC+	Candidate list	Carc. 1B Acute Tox. 4 Skin Sens. 1 Aquatic Acute 1 Aquatic Chronic 1
'842-07-9	C.I. Solvent Yellow 14	1	Plastics	Genotoxic, EDC+	-	Muta. 2 Carc. 2 Skin Sens. 1 Aquatic Chronic 4
'84-61-7	Dicyclohexyl phthalate	34	Plastics, Unspecified, Paper & Board, Metals	EDC~	Candidate list, CoRAP list	No harmonized CLP classification
'84-66-2	Diethyl phthalate	133	Plastics, Metals, Paper & Board, Unspecified, Multi-materials	Genotoxic, EDC~	CoRAP list	No harmonized CLP classification
'84-69-5	Diisobutyl phthalate	197	Paper & Board, Plastics, Unspecified, Metals, Multi-materials	EDC~	Candidate list, Authorisation list (annex XIV)	Repr. 1B
'84-74-2	1,2-Benzenedicarboxylic acid, dibutyl ester	290	Paper & Board, Plastics, Multi-materials, Unspecified, Metals	Genotoxic, EDC~	Candidate list, Authorisation list (annex XIV), Restriction list (annex XVII)	Repr. 1B Aquatic Acute 1
'85-68-7	Benzyl butyl phthalate	99	Plastics, Unspecified, Metals, Paper & Board, Multi-materials	Genotoxic, EDC+	Candidate list, Authorisation list (annex XIV), Restriction list (annex XVII)	Repr. 1B Aquatic Acute 1 Aquatic Chronic 1
'87-62-7	2,6-Dimethylaniline	8	Plastics, Unspecified, Multi-materials, Paper & Board	Genotoxic, EDC~	-	Carc. 2 Acute Tox. 4 Skin Irrit. 2 STOT SE 3 Aquatic Chronic 2
'87-68-3	Hexachloro-1,3-butadiene	1	Plastics	Genotoxic, EDC~	-	No harmonized CLP classification
'87-86-5	Pentachlorophenol	12	Paper & Board, Unspecified	Genotoxic, EDC+	-	Carc. 2 Acute Tox. 2 Acute Tox. 3 Eye Irrit. 2 STOT SE 3 Skin Irrit. 2 Aquatic Acute 1 Aquatic Chronic 1
'88-04-0	4-Chloro-3,5-dimethylphenol	1	Plastics	Genotoxic, EDC~	-	Acute Tox. 4 Skin Irrit. 2 Eye Irrit. 2 Skin Sens. 1
'88-06-2	2,4,6-Trichlorophenol	6	Paper & Board, Unspecified	Genotoxic, EDC+	-	Acute Tox. 4 Skin Irrit. 2 Eye Irrit. 2 Carc. 2 Aquatic Acute 1 Aquatic Chronic 1
'88-60-8	2-Tert-Butyl-5-methylphenol	2	Plastics	Genotoxic, EDC~	-	No harmonized CLP classification
'89-83-8	Thymol	4	Unspecified, Plastics	Genotoxic, EDC~	-	Acute Tox. 4 Aquatic Chronic 2 Skin Corr. 1B
'90-15-3	1-Naphthol	1	Metals	Genotoxic, EDC~	-	Acute Tox. 4 Skin Irrit. 2 Eye Dam. 1 STOT SE 3
'90-30-2	N-Phenyl-1-naphthylamine	2	Paper & Board	EDC~	CoRAP list	No harmonized CLP classification
'90-43-7	2-Phenylphenol	11	Paper & Board, Unspecified	Genotoxic, EDC+	-	Skin Irrit. 2 Eye Irrit. 2 STOT SE 3 Aquatic Acute 1
'91-59-8	2-Naphthylamine	5	Plastics, Unspecified	Genotoxic, EDC+	Restriction list (annex XVII)	Carc. 1A Acute Tox. 4 Aquatic Chronic 2
'91-94-1	3,3'-Dichlorobenzidine	6	Plastics, Multi-materials, Paper & Board	MC, Genotoxic	Restriction list (annex XVII)	Carc. 1B Acute Tox. 4 Skin Sens. 1 Aquatic Acute 1 Aquatic Chronic 1
'92-67-1	4-Biphenylamine	8	Paper & Board, Plastics	MC, Genotoxic	Candidate list, Restriction list (annex XVII)	Carc. 1A Acute Tox. 4
'92-87-5	C.I. Azoic Diazo Component 112	11	Paper & Board, Plastics, Unspecified	MC, Genotoxic, EDC+	Restriction list (annex XVII)	Carc. 1A Acute Tox. 4 Aquatic Acute 1 Aquatic Chronic 1
'94-13-3	Propylparaben	4	Paper & Board, Plastics, Unspecified	EDC+	CoRAP list	No harmonized CLP classification
'94-18-8	Benzyl 4-hydroxybenzoate	1	Paper & Board	EDC+	-	No harmonized CLP classification
'94-26-8	4-Hydroxybenzoic acid butyl ester	1	Plastics	EDC+	Candidate list	No harmonized CLP classification
'95-13-6	1H-Indene	1	Unspecified	EDC~	-	No harmonized CLP classification
'95-50-1	1,2-Dichlorobenzene	5	Multi-materials, Plastics, Unspecified	Genotoxic, EDC~	CoRAP list	Acute Tox. 4 Eye Irrit. 2 STOT SE 3 Skin Irrit. 2 Aquatic Acute 1 Aquatic Chronic 1
'95-53-4	2-Methylaniline	12	Paper & Board, Plastics, Unspecified	MC, Genotoxic	Candidate list	Carc. 1B Acute Tox. 3 Eye Irrit. 2 Aquatic Acute 1
'95-57-8	2-Chlorophenol	1	Metals	EDC~	-	Acute Tox. 4 Aquatic Chronic 2
'95-69-2	4-Chloro-2-methylaniline	7	Plastics, Unspecified, Paper & Board	Genotoxic, EDC+	-	Carc. 1B Muta. 2 Acute Tox. 3 Aquatic Acute 1 Aquatic Chronic 1
'95-80-7	2,4-Diaminotoluene	22	Paper & Board, Multi-materials, Plastics, Unspecified	MC, Genotoxic, EDC~	Candidate list	Carc. 1B Muta. 2 Repr. 2 Acute Tox. 3 Acute Tox. 4 STOT RE 2 Skin Sens. 1 Aquatic Chronic 2
'959-98-8	Endosulfan I	1	Unspecified	EDC~	-	No harmonized CLP classification
'96-09-3	Styrene oxide	2	Plastics	MC, Genotoxic	-	Carc. 1B Acute Tox. 4 Eye Irrit. 2
'97-52-9	2-Methoxy-4-nitroaniline	2	Paper & Board	Genotoxic, EDC+	-	No harmonized CLP classification
'97-53-0	Eugenol	5	Plastics, Unspecified	Genotoxic, EDC~	-	No harmonized CLP classification
'97-56-3	o-Aminoazotoluene	4	Plastics, Unspecified, Paper & Board	MC, Genotoxic, EDC+	Candidate list	Carc. 1B Skin Sens. 1
'98-54-4	4-(1,1-Dimethylethyl)phenol	4	Metals, Multi-materials, Plastics	EDC+	Candidate list, CoRAP list	Skin Irrit. 2 Eye Dam. 1 Aquatic Chronic 1 Repr. 2
'99-55-8	C.I. Azoic Diazo Component 12	1	Unspecified	Genotoxic, EDC+	-	Acute Tox. 3 Carc. 2 Aquatic Chronic 3
'99-76-3	Methylparaben	3	Paper & Board, Plastics	EDC+	CoRAP list	No harmonized CLP classification
'99-86-5	alpha-Terpinene	3	Metals, Plastics	EDC~	-	Flam. Liq. 3 Acute Tox. 4 Skin Sens. 1 Asp. Tox. 1 Aquatic Chronic 2
